# Supplementary material for: Uracil-Containing DNA in Drosophila: Stability, Stage-Specific Accumulation, and Developmental Involvement
Source: PLOS journal article supplement (doi:10.1371/journal.pgen.1002738), 2012-06-07
Supplement: S8 (10.1371/journal.pgen.1002738.s008) [file journal.pgen.1002738.s008]

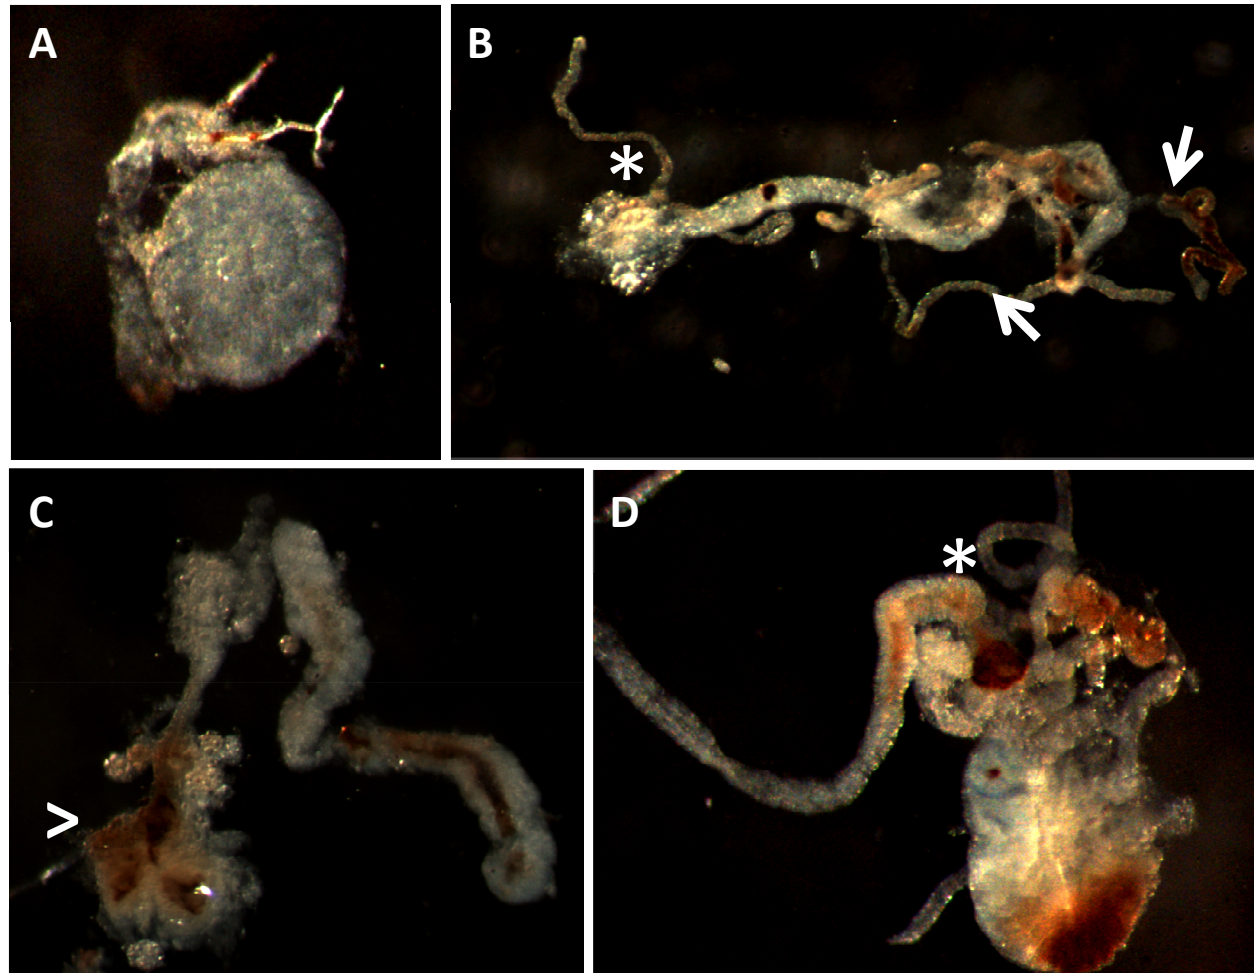

**Supplementary Figure S8**
