# Supplementary material for: Uracil-Containing DNA in Drosophila: Stability, Stage-Specific Accumulation, and Developmental Involvement
Source: PLOS journal article supplement (doi:10.1371/journal.pgen.1002738), 2012-06-07
Supplement: S11 (10.1371/journal.pgen.1002738.s011) [file journal.pgen.1002738.s011]

**Table S2 dUTPase transgene rescues the dUTPase RNAi phenotype**

Table shows the results of the rescue crosses. UAS-IR/SM6b; UAS-dUTPase-FLAG/TM3 males were crossed to Act-Gal4/CyO females (Fig. S4). Two UAS-IR (21883 and 21884) and two transgenic rescue lines (DmDUT20 and DMDUT29) were combined. Number of progenies of the relevant F1 categories is shown. Gene silencing was complete since no UAS-IR/Act-Gal4; TM3/+ adult progeny was observed. However, when the dUTPase transgene was present, rescued animals survived to adulthood.

|        |                          | Gene silencing       | Rescue of gene silencing           |
|--------|--------------------------|----------------------|------------------------------------|
|        |                          | UAS-IR/actGal4;TM3/+ | UAS-IR/actGal4;UAS dUTPase-FLAG /+ |
|        |                          | number of F1 adult   |                                    |
| UAS-IR | actGal4;UAS dUTPase-FLAG |                      |                                    |
| VDRC # | transformant line ID     |                      |                                    |
| 21883  | DMDUT20                  | 0                    | 72                                 |
| 21884  | DMDUT20                  | 0                    | 68                                 |
| 21883  | DMDUT29                  | 0                    | 29                                 |
| 21884  | DMDUT29                  | 0                    | 70                                 |
